# Supplementary material for: Frequency of large volcanic eruptions over the past 200 000 years
Source: Copernicus journal article supplement (doi:10.5194/cp-19-23-2023), 2023-01-06
Supplement: Supplementary file 1 [file cp-19-23-2023-supplement.zip]

Archive with 4 entries (4 files):
- EDCsulfate FIC_inputfile.xlsx
- matlabcode_toidentifyandcount_volcanicpeaks.m
- cp-19-23-2023-supplement-title-page.pdf
- SupplementaryData_S_isotopes.xlsx
