# Supplementary material for: Frequency of large volcanic eruptions over the past 200 000 years
Source: Copernicus journal article supplement (doi:10.5194/cp-19-23-2023), 2023-01-06
Supplement: Supplementary file 1 [file cp-19-23-2023-supplement.zip › cp-19-23-2023-supplement-title-page.pdf]

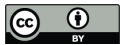

## *Supplement of*

# **Frequency of large volcanic eruptions over the past 200 000 years**

**Eric W. Wolff et al.**

*Correspondence to:* Eric W. Wolff (ew428@cam.ac.uk)

- cp-19-23-2023-supplement-title-page.pdf
- EDCsulfate FIC\_inputfile.xlsx
- SupplementaryData\_S\_isotopes.xlsx
- matlabcode\_toidentifyandcount\_volcanicpeaks.m

The copyright of individual parts of the supplement might differ from the article licence.
